# Supplementary material
Source: PubMed Central journal article supplement (PMC5786366)
Supplement: EBM701006_supplemental_material.pdf [file EBM701006_supplemental_material.pdf]

## Supplemental Information

**Movie S1: 15x15 Lines neonate cardiomyocyte muscular thin film contractility, baseline.**

Contractility measurement of 15x15 lines of neonatal rat ventricular myocytes paced at 2 Hz, no isoproterenol treatment.

**Movie S2: 15x15 Lines neonate muscular thin film isoproterenol concentration response,**

**1e<sup>-10</sup> M.** Contractility measurement of 15x15 lines of neonatal rat ventricular myocytes paced at 2 Hz exposed to a 1e<sup>-10</sup> M concentration of isoproterenol.

**Movie S3: 15x15 Lines neonate muscular thin film isoproterenol concentration response,**

**1e<sup>-9</sup> M.** Contractility measurement of 15x15 lines of neonatal rat ventricular myocytes paced at 2 Hz exposed to a 1e<sup>-9</sup> M concentration of isoproterenol.

**Movie S4: 15x15 Lines neonate muscular thin film isoproterenol concentration response,**

**1e<sup>-8</sup> M.** Contractility measurement of 15x15 lines of neonatal rat ventricular myocytes paced at 2 Hz exposed to a 1e<sup>-8</sup> M concentration of isoproterenol.

**Movie S5: 15x15 Lines neonate muscular thin film isoproterenol concentration response,**

**1e<sup>-7</sup> M.** Contractility measurement of 15x15 lines of neonatal rat ventricular myocytes paced at 2 Hz exposed to a 1e<sup>-7</sup> M concentration of isoproterenol.

**Movie S6: 15x15 Lines neonate muscular thin film isoproterenol concentration response,**

**1e<sup>-6</sup> M.** Contractility measurement of 15x15 lines of neonatal rat ventricular myocytes paced at 2 Hz exposed to a 1e<sup>-6</sup> M concentration of isoproterenol.

**Movie S7: 15x15 Lines neonate muscular thin film isoproterenol concentration response,**

**1e<sup>-5</sup> M.** Contractility measurement of 15x15 lines of neonatal rat ventricular myocytes paced at 2 Hz exposed to a 1e<sup>-5</sup> M concentration of isoproterenol.

**Movie S8: 15x15 Lines neonate muscular thin film isoproterenol concentration response,**

**1e<sup>-4</sup> M.** Contractility measurement of 15x15 lines of neonatal rat ventricular myocytes paced at 2 Hz exposed to a 1e<sup>-4</sup> M concentration of isoproterenol.

**Movie S9: 15x2 Aniso neonate cardiomyocyte muscular thin film contractility, baseline.**

Contractility measurement of 15x2 anisotropic monolayers of neonatal rat ventricular myocytes paced at 2 Hz, no isoproterenol treatment.

**Movie S10: 15x2 Aniso neonate muscular thin film isoproterenol concentration response,**

**1e<sup>-10</sup> M.** Contractility measurement of 15x2 anisotropic monolayers of neonatal rat ventricular myocytes paced at 2 Hz exposed to a 1e<sup>-10</sup> M concentration of isoproterenol.

**Movie S11: 15x2 Aniso neonate muscular thin film isoproterenol concentration response,  $1e^{-9}$  M.** Contractility measurement of 15x2 anisotropic monolayers of neonatal rat ventricular myocytes paced at 2 Hz exposed to a  $1e^{-9}$  M concentration of isoproterenol.

**Movie S12: 15x2 Aniso neonate muscular thin film isoproterenol concentration response,  $1e^{-8}$  M.** Contractility measurement of 15x2 anisotropic monolayers of neonatal rat ventricular myocytes paced at 2 Hz exposed to a  $1e^{-8}$  M concentration of isoproterenol.

**Movie S13: 15x2 Aniso neonate muscular thin film isoproterenol concentration response,  $1e^{-7}$  M.** Contractility measurement of 15x2 anisotropic monolayers of neonatal rat ventricular myocytes paced at 2 Hz exposed to a  $1e^{-7}$  M concentration of isoproterenol.

**Movie S14: 15x2 Aniso neonate muscular thin film isoproterenol concentration response,  $1e^{-6}$  M.** Contractility measurement of 15x2 anisotropic monolayers of neonatal rat ventricular myocytes paced at 2 Hz exposed to a  $1e^{-6}$  M concentration of isoproterenol.

**Movie S15: 15x2 Aniso neonate muscular thin film isoproterenol concentration response,  $1e^{-5}$  M.** Contractility measurement of 15x2 anisotropic monolayers of neonatal rat ventricular myocytes paced at 2 Hz exposed to a  $1e^{-5}$  M concentration of isoproterenol.

**Movie S16: 15x2 Aniso neonate muscular thin film isoproterenol concentration response,  $1e^{-4}$  M.** Contractility measurement of 15x2 anisotropic monolayers of neonatal rat ventricular myocytes paced at 2 Hz exposed to a  $1e^{-4}$  M concentration of isoproterenol.

**Table S1. Custom RT-qPCR array gene list**

| Gene Symbol   | Refseq #     | Gene Description                                       |
|---------------|--------------|--------------------------------------------------------|
| <i>Hey2</i>   | NM_130417    | Hairy/enhancer-of-split related with YRPW motif 2      |
| <i>Irx4</i>   | NM_001107330 | Iroquois homeobox 4                                    |
| <i>Mef2c</i>  | XM_574821    | Myocyte enhancer factor 2C                             |
| <i>Gata4</i>  | NM_144730    | GATA binding protein 4                                 |
| <i>Myocd</i>  | NM_182667    | Myocardin                                              |
| <i>Nkx2-5</i> | NM_053651    | NK2 transcription factor related, locus 5 (Drosophila) |
| <i>Tbx5</i>   | NM_001009964 | T-box 5                                                |
| <i>Nppa</i>   | NM_012612    | Natriuretic peptide precursor A                        |
| <i>Nppb</i>   | NM_031545    | Natriuretic peptide precursor B                        |
| <i>Acta1</i>  | NM_019212    | Actin, alpha 1, skeletal muscle                        |
| <i>Adra1b</i> | NM_016991    | Adrenergic, alpha-1B-, receptor                        |
| <i>Adra1d</i> | NM_024483    | Adrenergic, alpha-1D-, receptor                        |
| <i>Adra2a</i> | NM_012739    | Adrenergic, alpha-2A-, receptor                        |
| <i>Actc1</i>  | NM_019183    | Actin, alpha, cardiac muscle 1                         |
| <i>Actn1</i>  | NM_031005    | Actinin, alpha 1                                       |
| <i>Actn2</i>  | NM_001170325 | Actinin alpha 2                                        |
| <i>Pln</i>    | NM_022707    | Phospholamban                                          |
| <i>Tnni3</i>  | NM_017144    | Troponin I type 3 (cardiac)                            |

|                |              |                                                                           |
|----------------|--------------|---------------------------------------------------------------------------|
| <b>Tnnt2</b>   | NM_012676    | Troponin T type 2 (cardiac)                                               |
| <b>Ttn</b>     | XM_001065955 | Titin                                                                     |
| <b>Myh3</b>    | NM_012604    | Myosin, heavy chain 3, skeletal muscle, embryonic                         |
| <b>Myh6</b>    | NM_017239    | Myosin, heavy chain 6, cardiac muscle, alpha                              |
| <b>Myh7</b>    | NM_017240    | Myosin, heavy chain 7, cardiac muscle, beta                               |
| <b>MyI2</b>    | NM_001035252 | Myosin, light polypeptide 2, regulatory, cardiac, slow                    |
| <b>MyI3</b>    | NM_012606    | Myosin, light chain 3, alkali; ventricular, skeletal, slow                |
| <b>MyI4</b>    | NM_001109495 | Myosin, light chain 4                                                     |
| <b>MyI7</b>    | NM_001106017 | Myosin, light chain 7, regulatory                                         |
| <b>Cacna1c</b> | NM_012517    | Calcium channel, voltage-dependent, L type, alpha 1C subunit              |
| <b>Cacna1d</b> | NM_017298    | Calcium channel, voltage-dependent, L type, alpha 1D subunit              |
| <b>Cacna1g</b> | NM_031601    | Calcium channel, voltage-dependent, T type, alpha 1G subunit              |
| <b>Cacna1h</b> | NM_153814    | Calcium channel, voltage-dependent, T type, alpha 1H subunit              |
| <b>Cacna1s</b> | NM_053873    | Calcium channel, voltage-dependent, L type, alpha 1S subunit              |
| <b>Kcna5</b>   | NM_012972    | Potassium voltage-gated channel, shaker-related subfamily, member 5       |
| <b>Kcne1</b>   | NM_012973    | Potassium voltage-gated channel, Isk-related family, member 1             |
| <b>Kcne2</b>   | NM_133603    | Potassium voltage-gated channel, Isk-related family, member 2             |
| <b>Kcnd2</b>   | NM_031730    | Potassium voltage-gated channel, Shal-related subfamily, member 2         |
| <b>Kcnd3</b>   | NM_031739    | Potassium voltage-gated channel, Shal-related subfamily, member 3         |
| <b>Kcnh2</b>   | NM_053949    | Potassium voltage-gated channel, subfamily H (eag-related), member 2      |
| <b>Kcnj2</b>   | NM_017296    | Potassium inwardly-rectifying channel, subfamily J, member 2              |
| <b>Kcnj3</b>   | NM_031610    | Potassium inwardly-rectifying channel, subfamily J, member 3              |
| <b>Kcnj11</b>  | NM_031358    | Potassium inwardly rectifying channel, subfamily J, member 11             |
| <b>Kcnj12</b>  | NM_053981    | Potassium inwardly-rectifying channel, subfamily J, member 12             |
| <b>Kcnj14</b>  | NM_170718    | Potassium inwardly-rectifying channel, subfamily J, member 14             |
| <b>Kcnq1</b>   | NM_032073    | Potassium voltage-gated channel, KQT-like subfamily, member 1             |
| <b>Scn5a</b>   | NM_013125    | Sodium channel, voltage-gated, type V, alpha subunit                      |
| <b>Slc2a1</b>  | NM_138827    | Solute carrier family 2 (facilitated glucose transporter), member 1       |
| <b>Slc2a2</b>  | NM_012879    | Solute carrier family 2 (facilitated glucose transporter), member 2       |
| <b>Slc8a1</b>  | NM_019268    | Solute carrier family 8 (sodium/calcium exchanger), member 1              |
| <b>Hcn1</b>    | NM_053375    | Hyperpolarization-activated cyclic nucleotide-gated potassium channel 1   |
| <b>Hcn3</b>    | NM_053685    | Hyperpolarization-activated cyclic nucleotide-gated potassium channel 3   |
| <b>Hcn4</b>    | NM_021658    | Hyperpolarization activated cyclic nucleotide-gated potassium channel 4   |
| <b>Gja1</b>    | NM_012567    | Gap junction protein, alpha 1                                             |
| <b>Gja5</b>    | NM_019280    | Gap junction protein, alpha 5                                             |
| <b>Atp1a2</b>  | NM_012505    | ATPase, Na <sup>+</sup> /K <sup>+</sup> transporting, alpha 2 polypeptide |
| <b>Atp1a3</b>  | NM_012506    | ATPase, Na <sup>+</sup> /K <sup>+</sup> transporting, alpha 3 polypeptide |
| <b>Atp2a1</b>  | NM_058213    | ATPase, Ca <sup>++</sup> transporting, cardiac muscle, fast twitch 1      |
| <b>Atp2a2</b>  | NM_001110139 | ATPase, Ca <sup>++</sup> transporting, cardiac muscle, slow twitch 2      |
| <b>Ryr2</b>    | NM_001191043 | Ryanodine receptor 2, cardiac                                             |
| <b>Ckm</b>     | NM_012530    | Creatine kinase, muscle                                                   |
| <b>AcsI5</b>   | NM_053607    | Acyl-CoA synthetase long-chain family member 5                            |
| <b>Ptk2</b>    | NM_013081    | PTK2 protein tyrosine kinase 2                                            |
| <b>Iik</b>     | NM_133409    | Integrin-linked kinase                                                    |
| <b>Ctgf</b>    | NM_022266    | Connective tissue growth factor                                           |
| <b>Itga1</b>   | NM_030994    | Integrin, alpha 1                                                         |

|                      |              |                                                             |
|----------------------|--------------|-------------------------------------------------------------|
| <b><i>Itga2</i></b>  | XM_345156    | Integrin, alpha 2                                           |
| <b><i>Itga4</i></b>  | NM_001107737 | Integrin, alpha 4                                           |
| <b><i>Itga5</i></b>  | NM_001108118 | Integrin, alpha 5 (fibronectin receptor, alpha polypeptide) |
| <b><i>Itga6</i></b>  | XM_215984    | Integrin, alpha 6                                           |
| <b><i>Itgav</i></b>  | NM_001106549 | Integrin, alpha V                                           |
| <b><i>Itgb1</i></b>  | NM_017022    | Integrin, beta 1                                            |
| <b><i>Itgb3</i></b>  | NM_153720    | Integrin, beta 3                                            |
| <b><i>Abra</i></b>   | NM_175844    | Actin-binding Rho activating protein                        |
| <b><i>Rhoa</i></b>   | NM_057132    | Ras homolog gene family, member A                           |
| <b><i>Cdc42</i></b>  | NM_171994    | Cell division cycle 42 (GTP binding protein)                |
| <b><i>Rac1</i></b>   | NM_134366    | Ras-related C3 botulinum toxin substrate 1                  |
| <b><i>Rock1</i></b>  | NM_031098    | Rho-associated coiled-coil containing protein kinase 1      |
| <b><i>Rock2</i></b>  | NM_013022    | Rho-associated coiled-coil containing protein kinase 2      |
| <b><i>Rnd1</i></b>   | NM_001013222 | Rho family GTPase 1                                         |
| <b><i>Vcl</i></b>    | NM_001107248 | Vinculin                                                    |
| <b><i>Ctnnb1</i></b> | NM_053357    | Catenin (cadherin associated protein), beta 1               |
| <b><i>Vegfa</i></b>  | NM_031836    | Vascular endothelial growth factor A                        |
| <b><i>Ctf1</i></b>   | NM_017129    | Cardiotrophin 1                                             |
| <b><i>Itpr2</i></b>  | NM_031046    | Inositol 1,4,5-triphosphate receptor, type 2                |
| <b><i>Tgfb2</i></b>  | NM_031131    | Transforming growth factor, beta 2                          |
| <b><i>Mylk3</i></b>  | NM_001110810 | Myosin light chain kinase 3                                 |
| <b><i>Camk2d</i></b> | NM_012519    | Calcium/calmodulin-dependent protein kinase II delta        |
| <b><i>Gapdh</i></b>  | NM_017008    | Glyceraldehyde-3-phosphate dehydrogenase                    |
| <b><i>Rplp1</i></b>  | NM_001007604 | Ribosomal protein, large, P1                                |
| <b><i>Actb</i></b>   | NM_031144    | Actin, beta                                                 |
